# Supplementary material
Source: Springer Nature journal article supplement (https://www.springermedizin.de/resource/supplementary/13053_2009_140_MOESM3_ESM.pdf/9674280)

Figure 2

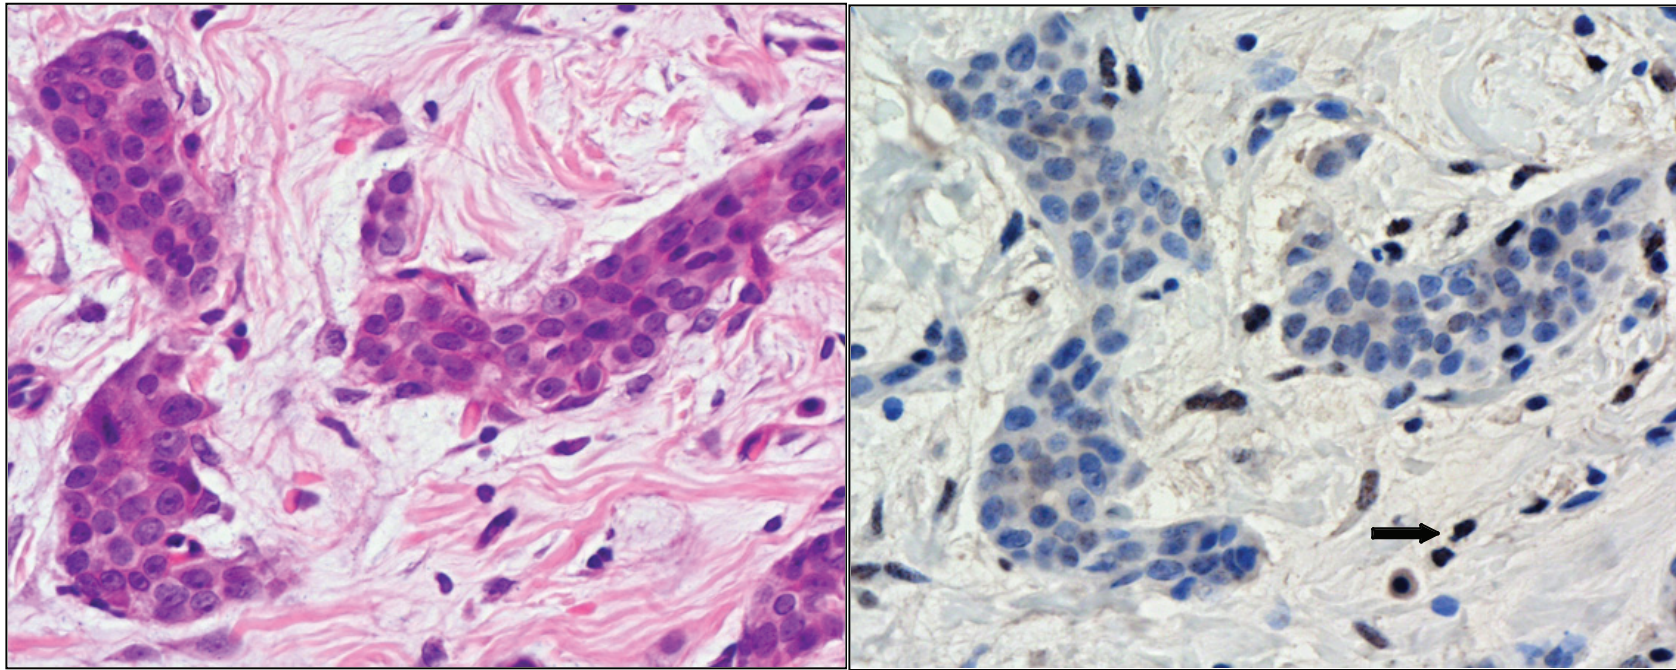

Supplement: MOESM3 [file 9674280]
